# Supplementary material for: High-performance and self-powered photodetectors from an S-scheme Cs2SnI2Cl2/Cs2TiI6 heterojunction: a DFT+NAMD study
Source: Royal Society of Chemistry journal article supplement (doi:10.1039/d3cp04415g), 2023-01-01
Supplement: d3cp04415g1.pdf [file d3cp04415g1.pdf]

## Supplemental Material

# High-performance and self-powered photodetectors from S-scheme $\text{Cs}_2\text{SnI}_2\text{Cl}_2/\text{Cs}_2\text{TiI}_6$ heterojunction: A DFT+NAMD study

Dongxiang Li<sup>\*ab</sup>, Ruiqin Li<sup>a</sup>

<sup>a</sup> College of Electronic and Information Engineering, Anshun University, Anshun, 561000, China

<sup>b</sup> College of Big Data and Information Engineering, Guizhou University, Guiyang 550025, China

**Table 1S Band gaps of  $\text{Cs}_2\text{TiI}_6$  and  $\text{Cs}_2\text{SnI}_2\text{Cl}_2$  obtained by different methods**

| System                               | GGA-PBE | HSE06   | HSE06+SOC              | GGA_1/2 | Experiment             |
|--------------------------------------|---------|---------|------------------------|---------|------------------------|
| $\text{Cs}_2\text{TiI}_6$            | 0.86 eV | 1.90 eV | 1.7 eV <sup>[1]</sup>  | 1.03 eV | 1.02 eV <sup>[2]</sup> |
| $\text{Cs}_2\text{SnI}_2\text{Cl}_2$ | 1.59 eV | 2.23 eV | 2.07 eV <sup>[3]</sup> | 2.34 eV | 2.62 eV <sup>[4]</sup> |

**Table 2S Calculated effective masses of electrons and holes for  $\text{Cs}_2\text{SnI}_2\text{Cl}_2$  surface,  $\text{Cs}_2\text{TiI}_6$  surface and  $\text{Cs}_2\text{SnI}_2\text{Cl}_2/\text{Cs}_2\text{TiI}_6$  heterojunction**

|                                                              | $m_h^*/m_0$            | $m_e^*/m_0$            | $m_h^*/m_0$            | $m_e^*/m_0$            |
|--------------------------------------------------------------|------------------------|------------------------|------------------------|------------------------|
|                                                              | $\Gamma \rightarrow X$ |                        | $\Gamma \rightarrow M$ |                        |
| $\text{Cs}_2\text{SnI}_2\text{Cl}_2/\text{Cs}_2\text{TiI}_6$ | 0.63                   | 0.35                   | 0.64                   | 0.34                   |
| <sup>6</sup><br>$\text{Cs}_2\text{SnI}_2\text{Cl}_2$         | 1.03                   | 0.40                   | 1.05                   | 1.43                   |
|                                                              | $M \rightarrow X$      | $\Gamma \rightarrow X$ | $M \rightarrow \Gamma$ | $\Gamma \rightarrow M$ |
| $\text{Cs}_2\text{TiI}_6$                                    | 0.02                   | 0.31                   | 0.01                   | 0.31                   |

\* Corresponding author

E-mail: ldx0601@163.com (D. Li)

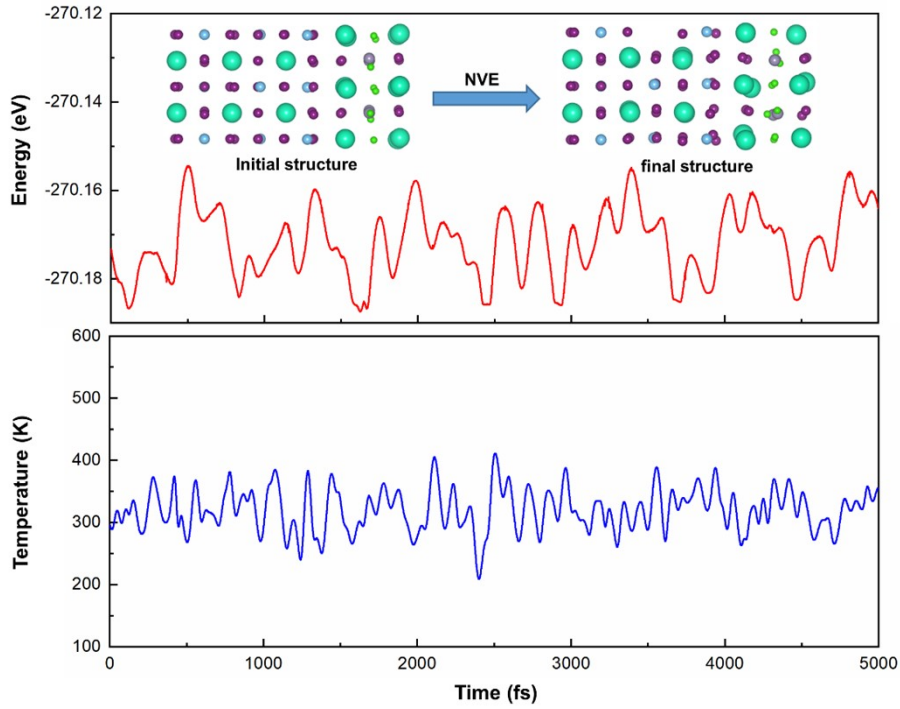

Fig. 1S Total energy and temperature fluctuations with respect to molecular dynamic steps at 300K for  $\text{Cs}_2\text{SnI}_2\text{Cl}_2/\text{Cs}_2\text{TiI}_6$  heterojunction

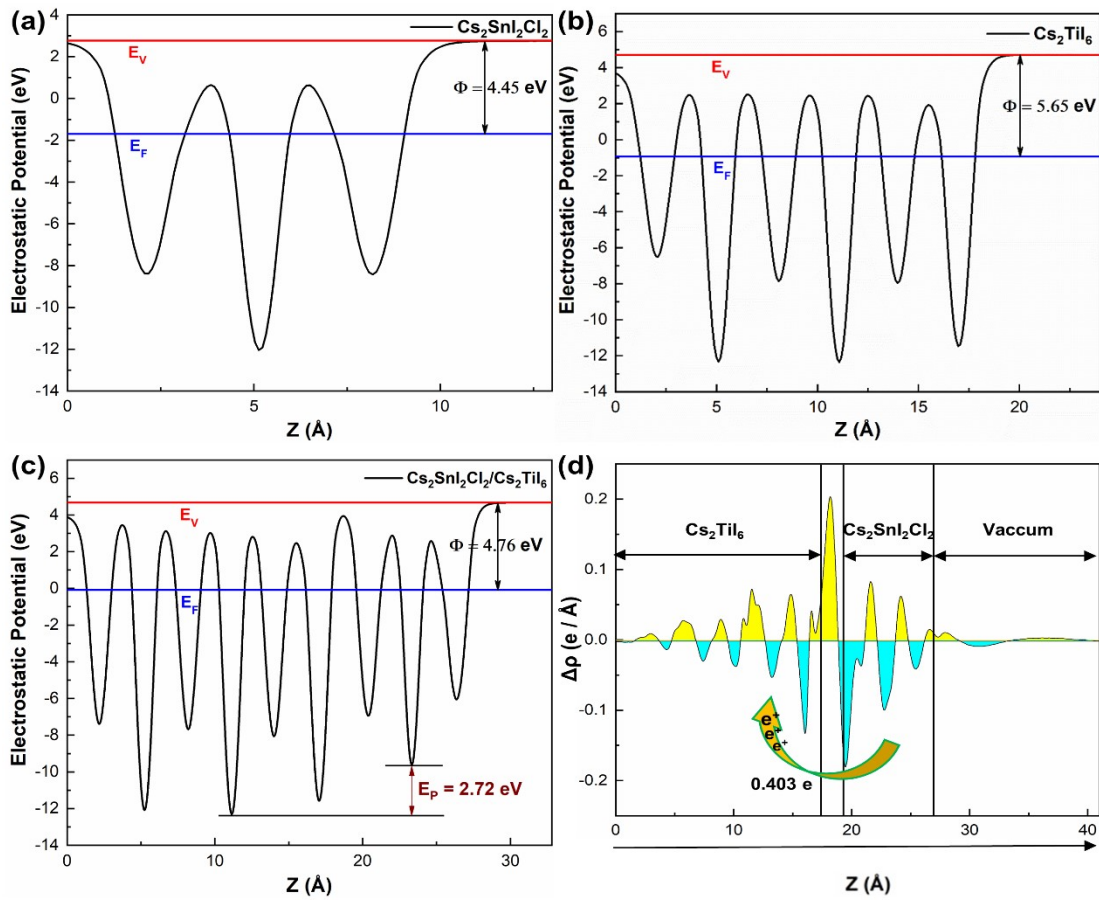

Fig. 2S The work functions of (a)  $\text{Cs}_2\text{SnI}_2\text{Cl}_2$  surface, (b)  $\text{Cs}_2\text{TiI}_6$  surface and (c)

$\text{Cs}_2\text{SnI}_2\text{Cl}_2/\text{Cs}_2\text{TiI}_6$ .  $E_v$ ,  $E_f$  and  $E_p$  are vacuum level, fermi level and interface potential drop, respectively. (d) The planar-averaged charge density difference  $\Delta\rho$  for  $\text{Cs}_2\text{SnI}_2\text{Cl}_2/\text{Cs}_2\text{TiI}_6$  heterojunction. The cyan and yellow sections show electron depletion and concentration, respectively.

## References

- [1] S. R. Kavanagh, C. N. Savory, S. M. Liga, G. Konstantatos, A. Walsh and D. O. Scanlon, *J. Phys. Chem. Lett.*, 2022, 13, 10965.
- [2] M. G. Ju, M. Chen, Y. Zhou, H. F. Garces, J. Dai, L. Ma, N. P. Padture and X. C. Zeng, *ACS Energy Lett.*, 2018, 3, 297.
- [3] Z. Xu, M. Chen and S. F. Liu, *J. Phys. Chem. C*, 2019, 123, 27978.
- [4] J. Li, C. C. Stoumpos, G. G. Trimarchi, I. Chung, L. Mao, M. Chen, M. R. Wasielewski, L. Wang and M. G. Kanatzidis, *Chem. Mater.*, 2018, 30, 4847.
